# Supplementary material
Source: PubMed Central journal article supplement (PMC6027921)
Supplement: 10.1194_M084202_jlr.M084202-1.pdf [file 10.1194_M084202_jlr.M084202-1.pdf]

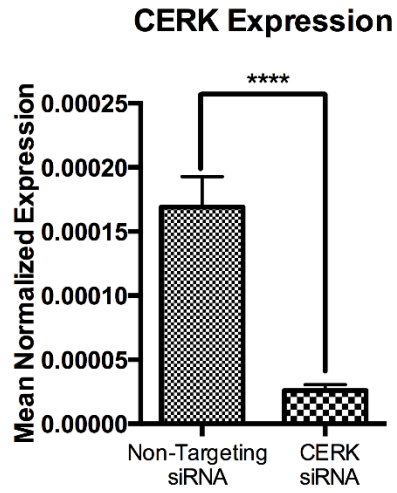

**Supplemental figure S1. CERK siRNA is able to efficiently knock down CERK expression.** MCF7 cells were treated with non-targeting (All Star) or CERK siRNA for 24 hrs. CERK mRNA levels were measured.

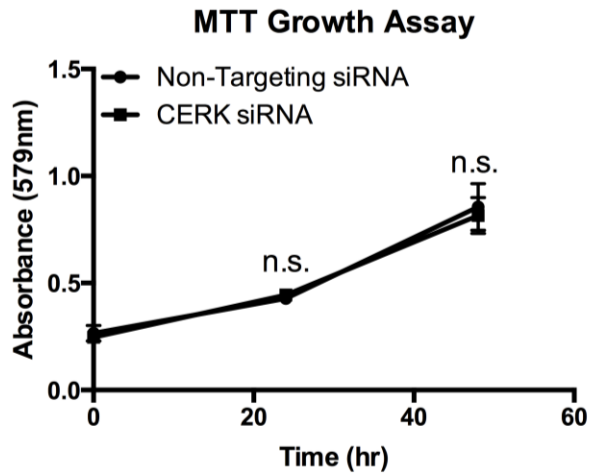

**Supplemental figure S2. CERK siRNA is able to efficiently knock down CERK expression and does not impact growth.** MDA cells were treated with non-targeting (All Star) or CERK siRNA for 24 hrs and harvested for MTT assay at the indicated timepoints. n=3, \*\*\*\* p<0.001.
